# Supplementary material for: Contraction Patterns of the Right Ventricle Associated with Different Degrees of Left Ventricular Systolic Dysfunction
Source: PubMed Central journal article supplement — Circ Cardiovasc Imaging. 2021 Sep 30;14(10):e012774. doi: 10.1161/CIRCIMAGING.121.012774 (PMC8522626; doi:10.1161/circimaging.121.012774), 2021-09-30
Supplement: hci-14-e012774-s001.pdf [file hci-14-e012774-s001.pdf]

## SUPPLEMENTAL MATERIAL

### *Contraction patterns of the right ventricle associated with different degrees of left ventricular systolic dysfunction*

#### Supplementary Figure I

LV and RV indexed stroke volumes in four groups of patients.

Data are presented as means, bars depict standard deviations. Wilcoxon matched-pairs signed rank test was used to compare the RV and LV stroke volumes within each group.

MoD - Median of Differences; SVi – stroke volume index.

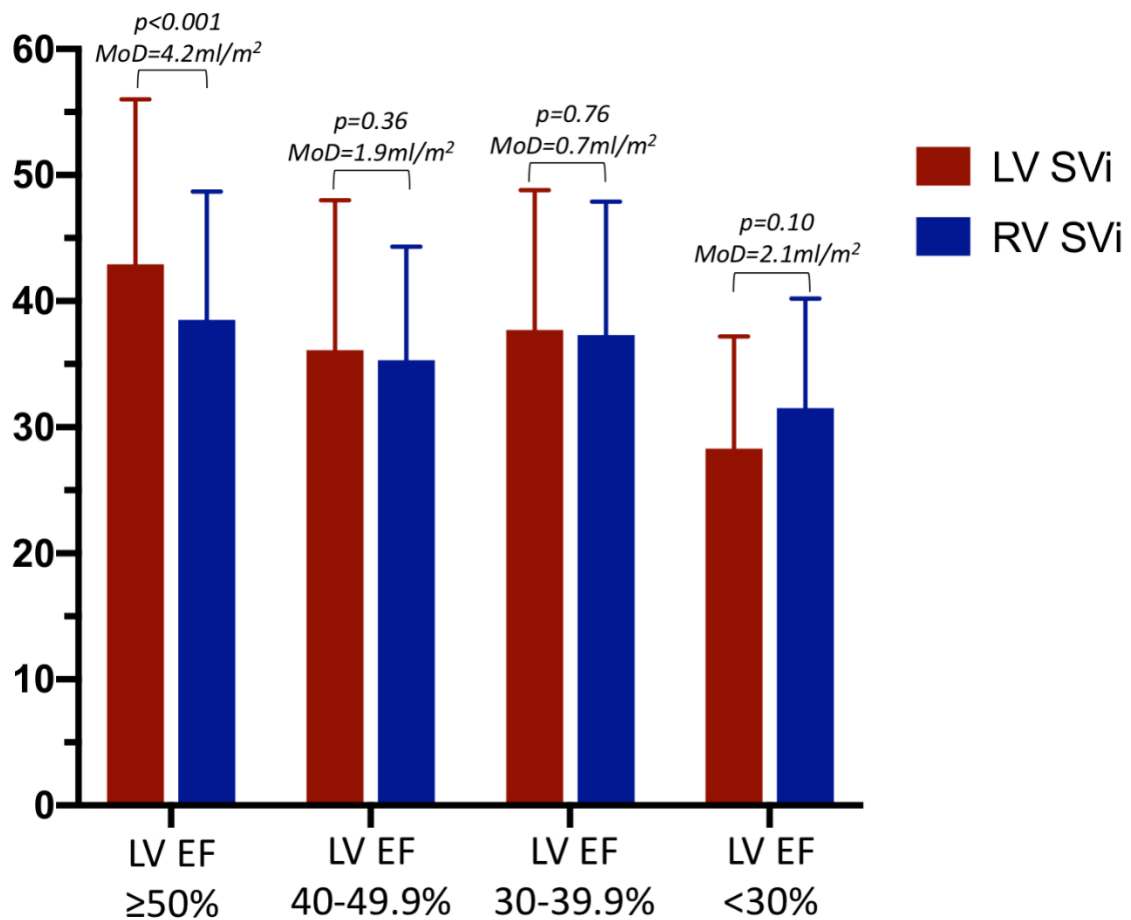

### Supplementary Figure II

Comparison of the relative contribution of longitudinal (red bars, LEFi), radial (orange bars, REFi) and anteroposterior (purple bars, AEFi) motion components to total right ventricular ejection fraction in patients with maintained ( $\geq 50\%$ ) and reduced ( $< 50\%$ ) left ventricular ejection fraction (LVEF) with left-sided heart disease. In patients with maintained LVEF, the relative contribution of the radial motion component is significantly higher compared to both longitudinal and anteroposterior components, which pattern becomes even more pronounced in patients with reduced LVEF.

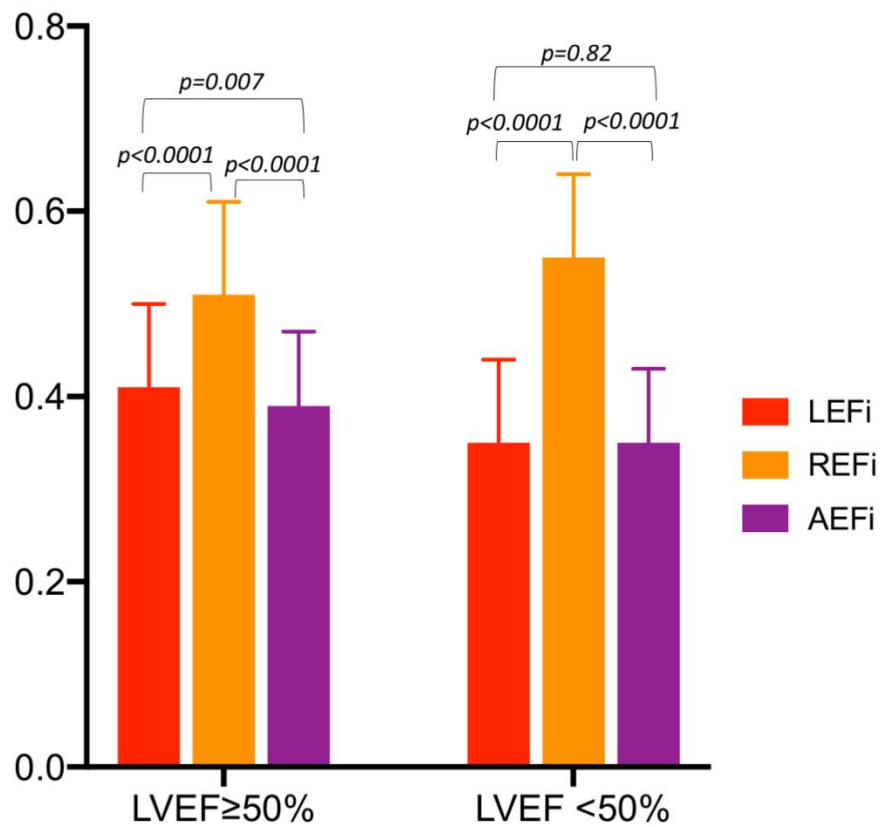

**Supplementary Table I****Intra- and interobserver variability and reliability of global and decomposed right ventricular metrics**

|                               | Intraclass correlation coefficient |               | Coefficient of variability (%) |               |
|-------------------------------|------------------------------------|---------------|--------------------------------|---------------|
|                               | intraobserver                      | interobserver | intraobserver                  | interobserver |
| RV EDV                        | 0.981                              | 0.973         | 4.049                          | 5.456         |
| RV ESV                        | 0.985                              | 0.986         | 6.044                          | 5.296         |
| RV EF                         | 0.949                              | 0.954         | 6.529                          | 5.366         |
| RV ESV (longitudinal only)    | 0.975                              | 0.958         | 5.352                          | 7.195         |
| RV LEF                        | 0.873                              | 0.808         | 14.363                         | 21.312        |
| RV ESV (anteroposterior only) | 0.954                              | 0.950         | 7.873                          | 7.897         |
| RV AEF                        | 0.853                              | 0.833         | 18.551                         | 19.437        |
| RV ESV (radial only)          | 0.962                              | 0.959         | 8.178                          | 8.278         |
| RV REF                        | 0.854                              | 0.844         | 17.991                         | 18.867        |

**Supplementary Table II** Echocardiographic characteristics of coronary artery disease patients

(n=132) stratified according to left ventricular ejection fraction

| Parameter                                  | LV EF ≥50%<br>(N=61) | LV EF 40-49.9%<br>(N=37) | LV EF 30-39.9%<br>(N=22) | LV EF <30%<br>(N=12) | Overall<br>p-value |
|--------------------------------------------|----------------------|--------------------------|--------------------------|----------------------|--------------------|
| LV EF, %                                   | 57.9 ± 5.2           | 45.6 ± 2.7*              | 35.6 ± 2.9*†             | 22.9 ± 4.7*†‡        | <0.001             |
| RV EF, %                                   | 48.1 ± 6.3           | 48.2 ± 5.2               | 46.3 ± 6.0               | 31.8 ± 8.0*†‡        | <0.001             |
| RV EF ≤45 (%)                              | 16 (26.2)            | 10 (27.0)                | 5 (22.7)                 | 11 (91.7)*†‡         | <0.001             |
| RV LEF, %                                  | 18.7 ± 5.6           | 17.1 ± 4.4               | 14.9 ± 4.4*              | 10.2 ± 4.9*†‡        | <0.001             |
| RV REF, %                                  | 25.0 ± 6.6           | 27.4 ± 5.7               | 27.6 ± 4.7               | 16.6 ± 5.2*†‡        | <0.001             |
| RV AEF, %                                  | 17.9 ± 5.1           | 17.6 ± 4.7               | 15.8 ± 2.9               | 10.4 ± 4.4*†‡        | <0.001             |
| RV LEFi                                    | 0.39 ± 0.10          | 0.35 ± 0.08              | 0.32 ± 0.07*             | 0.32 ± 0.10          | 0.004              |
| RV REFi                                    | 0.52 ± 0.11          | 0.57 ± 0.09              | 0.60 ± 0.07*             | 0.53 ± 0.11          | 0.005              |
| RV AEFi                                    | 0.37 ± 0.08          | 0.36 ± 0.08              | 0.34 ± 0.05              | 0.32 ± 0.06          | 0.171              |
| TAPSE, mm                                  | 21.6 ± 5.4           | 20.2 ± 5.2               | 19.5 ± 3.9               | 16.1 ± 4.7*          | 0.007              |
| FAC, %                                     | 42.9 ± 8.9           | 42.8 ± 7.1               | 40.2 ± 8.5               | 25.5 ± 10.2*†‡       | <0.001             |
| 2DE free-wall<br>longitudinal<br>strain, % | -26.2 ± 5.2          | -25.3 ± 5.7              | -24.0 ± 4.2              | -18.7 ± 7.5*†        | 0.011              |
| PASP, mmHg                                 | 28.6 ± 15.0          | 27.9 ± 8.6               | 33.1 ± 15.0              | 42.3 ± 18.7*         | 0.026              |

Values are reported as mean ± standard deviation (SD) or n (%).

\*p<0.05 vs. LV EF ≥50%. †† p<0.05 vs. LV EF 40-49.9%. ‡ p<0.05 vs. LV EF 30-39.9%.

**Supplementary Table III** Echocardiographic characteristics of dilated and hypertrophic cardiomyopathy patients (n=48) stratified according to left ventricular ejection fraction

| Parameter                                  | LV EF ≥50%<br>(N=10) | LV EF 40-49.9%<br>(N=9) | LV EF 30-39.9%<br>(N=12) | LV EF <30%<br>(N=17) | Overall<br>p-value |
|--------------------------------------------|----------------------|-------------------------|--------------------------|----------------------|--------------------|
| LV EF, %                                   | 62.2 ± 4.5           | 45.8 ± 2.7*             | 35.8 ± 3.2*†             | 18.9 ± 6.3*†‡        | <0.001             |
| RV EF, %                                   | 51.1 ± 7.0           | 46.9 ± 2.7              | 41.1 ± 9.5*              | 29.4 ± 8.6*†‡        | <0.001             |
| RV EF ≤45 (%)                              | 2 (20.0)             | 1 (11.1)                | 7 (58.3)                 | 16 (94.1)*†          | <0.001             |
| RV LEF, %                                  | 21.1 ± 6.0           | 15.9 ± 3.4              | 16.6 ± 6.4               | 8.9 ± 3.1*†‡         | <0.001             |
| RV REF, %                                  | 26.9 ± 6.8           | 25.6 ± 5.0              | 19.5 ± 6.8               | 16.9 ± 6.9*†         | 0.002              |
| RV AEF, %                                  | 20.5 ± 2.8           | 19.6 ± 3.7              | 14.7 ± 5.3*†             | 8.2 ± 3.8*†‡         | <0.001             |
| RV LEFi                                    | 0.41 ± 0.08          | 0.34 ± 0.07             | 0.40 ± 0.09              | 0.31 ± 0.09          | 0.045              |
| RV REFi                                    | 0.52 ± 0.09          | 0.55 ± 0.11             | 0.47 ± 0.10              | 0.57 ± 0.09          | 0.067              |
| RV AEFi                                    | 0.40 ± 0.03          | 0.42 ± 0.06             | 0.35 ± 0.08              | 0.27 ± 0.08*†‡       | <0.001             |
| TAPSE, mm                                  | 22.8 ± 3.2           | 22.6 ± 3.6              | 18.1 ± 4.3*              | 15.1 ± 3.9*†         | <0.001             |
| FAC, %                                     | 42.4 ± 9.5           | 44.8 ± 3.1              | 34.0 ± 9.7               | 24.2 ± 9.4*†         | <0.001             |
| 2DE free-wall<br>longitudinal<br>strain, % | -27.6 ± 4.2          | -23.3 ± 3.4             | -20.8 ± 6.4*             | -14.4 ± 3.3*†‡       | <0.001             |
| PASP, mmHg                                 | 21.8 ± 5.3           | 22.8 ± 4.2              | 23.2 ± 7.2               | 40.9 ± 13.7*†‡       | <0.001             |

Values are reported as mean ± standard deviation (SD) or n (%).

\*p<0.05 vs. LV EF ≥50%. † p<0.05 vs. LV EF 40-49.9%. ‡ p<0.05 vs. LV EF 30-39.9%.

**Supplementary Table IV** Clinical and echocardiographic characteristics of the patients according to the composite outcome of cardiac death or heart failure hospitalization.

| Variable                                         | Cardiac death or heart failure hospitalization (N=107) | No events (N=185) | p value      |
|--------------------------------------------------|--------------------------------------------------------|-------------------|--------------|
| Age, years                                       | 63±19                                                  | 56±16             | <0.001       |
| Gender, male (%)                                 | 74 (69.2)                                              | 129 (69.7)        | 1.000        |
| Body surface area, m <sup>2</sup>                | 1.81±0.20                                              | 1.83±0.19         | 0.322        |
| BMI, kg/m <sup>2</sup>                           | 24.9±3.8                                               | 25.0±3.4          | 0.556        |
| Systolic blood pressure, mmHg                    | 123±21                                                 | 125±16            | 0.096        |
| Diastolic blood pressure, mmHg                   | 72±10                                                  | 76±10             | <b>0.007</b> |
| Smoking (%)                                      | 32 (29.9)                                              | 73 (39.5)         | 0.130        |
| Diabetes (%)                                     | 29 (27.1)                                              | 17 (9.2)          | <0.001       |
| Dyslipidemia (%)                                 | 46 (43.0)                                              | 79 (42.7)         | 1.000        |
| Obesity (%)                                      | 10 (9.3)                                               | 13 (7.0)          | 0.629        |
| Family history of CAD (%)                        | 22 (20.6)                                              | 50 (27.0)         | 0.274        |
| History of atrial fibrillation (%)               | 31 (29.0)                                              | 17 (9.2)          | <0.001       |
| Hypertension (%)                                 | 67 (62.6)                                              | 103 (55.7)        | 0.300        |
| CAD (%)                                          | 44 (41.1)                                              | 88 (47.6)         | 0.345        |
| Valvular heart disease (%)                       | 36 (33.6)                                              | 42 (22.7)         | 0.058        |
| Mitral valve disease (%)                         | 14 (13.1)                                              | 15 (8.1)          | 0.169        |
| Aortic valve disease (%)                         | 8 (7.5)                                                | 17 (9.2)          | 0.618        |
| Both mitral and aortic valve disease (%)         | 2 (1.9)                                                | 1 (0.5)           | 0.251        |
| Previous MVR and/or AVR (%)                      | 12 (11.2)                                              | 9 (4.9)           | <b>0.045</b> |
| Cardiomyopathies (%)                             | 26 (24.3)                                              | 28 (15.1)         | 0.074        |
| LV end-diastolic volume index, ml/m <sup>2</sup> | 100.9±43.9                                             | 79.0±23.7         | <0.001       |
| LV end-systolic volume index, ml/m <sup>2</sup>  | 61.9±42.3                                              | 38.6±20.9         | <0.001       |

|                                                  |            |           |        |
|--------------------------------------------------|------------|-----------|--------|
| LV ejection fraction, %                          | 43.3±16.5  | 53.2±11.5 | <0.001 |
| LV mass index, g/m <sup>2</sup>                  | 110.4±24.8 | 98.8±22.2 | <0.001 |
| 2DE LV GLS, %                                    | -12.8±5.6  | -15.7±4.4 | <0.001 |
| 2DE left atrial volume index, ml/m <sup>2</sup>  | 66.0±65.9  | 41.2±17.3 | <0.001 |
| RV end-diastolic volume index, ml/m <sup>2</sup> | 87.0±24.4  | 78.1±21.1 | <0.001 |
| RV end-systolic volume index, ml/m <sup>2</sup>  | 51.3±21.6  | 40.2±15.6 | <0.001 |
| RV ejection fraction, %                          | 42.5±10.3  | 49.1±7.5  | <0.001 |
| RV longitudinal ejection fraction, %             | 15.4 ± 6.5 | 19.7±5.8  | <0.001 |
| RV radial ejection fraction, %                   | 23.1±7.5   | 25.6±6.5  | 0.003  |
| RV anteroposterior ejection fraction, %          | 14.8±5.8   | 19.0±5.3  | <0.001 |
| RV LEFi                                          | 35.7±10.1  | 39.9±8.6  | <0.001 |
| RV REFi                                          | 54.2±10.4  | 52.2±9.9  | 0.107  |
| RV AEFi                                          | 34.0±7.8   | 38.4±7.5  | <0.001 |
| TAPSE, mm                                        | 18.2±5.8   | 21.8±4.8  | <0.001 |
| FAC, %                                           | 35.6±11.5  | 41.5±8.8  | <0.001 |
| 2DE free-wall longitudinal strain, %             | -22.5±7.2  | -26.7±5.9 | <0.001 |
| PASP, mmHg <sup>a</sup>                          | 35.9±13.8  | 28.1±11.2 | <0.001 |

Values are reported as mean ± standard deviation (SD) or n (%).

AVR – aortic valve replacement or repair; BMI – body mass index; CAD – coronary artery disease; MVR – mitral valve replacement or repair.

## Supplementary Table V

Parameters associated with cardiac death and heart failure hospitalization in the entire study cohort

|                                                      | Hazard Ratio<br>[95% Confidence Interval] | p value          |
|------------------------------------------------------|-------------------------------------------|------------------|
| <b>Age, n = 292</b>                                  | <b>1.019 [1.006 – 1.032]</b>              | <b>0.003</b>     |
| Male, n = 292                                        | 0.996 [0.661 – 1.502]                     | 0.986            |
| Body surface area, n = 292                           | 0.541 [0.199 – 1.472]                     | 0.229            |
| BMI, n = 292                                         | 0.983 [0.930 – 1.039]                     | 0.537            |
| Smoking, n = 292                                     | 0.692 [0.458 – 1.048]                     | 0.082            |
| <b>Diabetes, n = 292</b>                             | <b>2.456 [1.602 – 3.766]</b>              | <b>&lt;0.001</b> |
| Dyslipidemia, n = 292                                | 0.944 [0.644 – 1.385]                     | 0.769            |
| Obesity, n = 292                                     | 1.212 [0.632 – 2.324]                     | 0.562            |
| Family history of CAD, n = 292                       | 0.751 [0.470 – 1.200]                     | 0.231            |
| <b>History of atrial fibrillation, n = 292</b>       | <b>2.514 [1.653 – 3.824]</b>              | <b>&lt;0.001</b> |
| Hypertension, n = 292                                | 1.154 [0.780 – 1.707]                     | 0.475            |
| CAD, n = 292                                         | 0.793 [0.539 – 1.166]                     | 0.238            |
| Valvular heart disease, n = 292                      | 1.485 [0.994 – 2.217]                     | 0.054            |
| <b>Cardiomyopathy, n = 292</b>                       | <b>1.660 [1.067 – 2.583]</b>              | <b>0.025</b>     |
| <b>LV end-diastolic volume index, n = 292</b>        | <b>1.015 [1.010 – 1.019]</b>              | <b>&lt;0.001</b> |
| <b>LV end-systolic volume index, n = 292</b>         | <b>1.017 [1.012 – 1.021]</b>              | <b>&lt;0.001</b> |
| <b>LV ejection fraction, n = 292</b>                 | <b>0.959 [0.947 – 0.971]</b>              | <b>&lt;0.001</b> |
| <b>LV mass index, n = 261</b>                        | <b>1.017 [1.009 – 1.025]</b>              | <b>&lt;0.001</b> |
| <b>2DE LV GLS, n = 263</b>                           | <b>1.112 [1.066 – 1.160]</b>              | <b>&lt;0.001</b> |
| <b>2DE left atrial volume index, n = 221</b>         | <b>1.006 [1.004 – 1.009]</b>              | <b>&lt;0.001</b> |
| <b>RV end-diastolic volume index, n = 292</b>        | <b>1.015 [1.008 – 1.023]</b>              | <b>&lt;0.001</b> |
| <b>RV end-systolic volume index, n = 292</b>         | <b>1.025 [1.017 – 1.033]</b>              | <b>&lt;0.001</b> |
| <b>RV ejection fraction, n = 292</b>                 | <b>0.940 [0.925 – 0.956]</b>              | <b>&lt;0.001</b> |
| <b>RV longitudinal ejection fraction, n = 292</b>    | <b>0.903 [0.873 – 0.933]</b>              | <b>&lt;0.001</b> |
| <b>RV radial ejection fraction, n = 292</b>          | <b>0.947 [0.920 – 0.974]</b>              | <b>&lt;0.001</b> |
| <b>RV anteroposterior ejection fraction, n = 292</b> | <b>0.893 [0.865 – 0.923]</b>              | <b>&lt;0.001</b> |
| <b>RV LEFi, n = 292</b>                              | <b>0.960 [0.939 – 0.980]</b>              | <b>&lt;0.001</b> |
| <b>RV REFi, n = 292</b>                              | 1.014 [0.994 – 1.033]                     | 0.167            |



|                                                   |                              |                  |
|---------------------------------------------------|------------------------------|------------------|
| <b>RV AEFi, n = 292</b>                           | <b>0.946 [0.924 – 0.967]</b> | <b>&lt;0.001</b> |
| <b>TAPSE, n = 291</b>                             | <b>0.903 [0.872 – 0.935]</b> | <b>&lt;0.001</b> |
| <b>FAC, n = 292</b>                               | <b>0.952 [0.936 – 0.969]</b> | <b>&lt;0.001</b> |
| <b>2DE free-wall longitudinal strain, n = 288</b> | <b>1.090 [1.060 – 1.121]</b> | <b>&lt;0.001</b> |
| <b>PASP, n = 262</b>                              | <b>1.029 [1.018 – 1.040]</b> | <b>&lt;0.001</b> |

---

The value after a variable's name indicates the number of patients with available data.

## Supplementary Table VI

Factors associated with cardiac death and heart failure hospitalization in the entire study cohort

Including LEF or LEFi (entire study cohort):

|                        | Univariable              |         | Multivariable            |         | Multivariable            |         |
|------------------------|--------------------------|---------|--------------------------|---------|--------------------------|---------|
|                        | HR [95% CI]              | p-value | HR [95% CI]              | p-value | HR [95% CI]              | p-value |
| Age                    | 1.019<br>[1.006 – 1.032] | 0.003   |                          |         |                          |         |
| Diabetes               | 2.456<br>[1.602 – 3.766] | <0.001  | 2.018<br>[1.277 – 3.190] | 0.003   | 2.031<br>[1.285 – 3.209] | 0.002   |
| Atrial fibrillation    | 2.514<br>[1.653 – 3.824] | <0.001  |                          |         |                          |         |
| Cardiomyopathy         | 1.660<br>[1.067 – 2.583] | 0.025   |                          |         |                          |         |
| Valvular heart disease | 1.485<br>[0.994 – 2.217] | 0.054   | 2.280<br>[1.426 – 3.646] | <0.001  | 2.301<br>[1.436 – 3.688] | <0.001  |
| LV ejection fraction   | 0.967<br>[0.944 – 0.990] | <0.001  | 0.973<br>[0.957 – 0.989] | 0.001   | 0.964<br>[0.950 – 0.978] | <0.001  |
| RV LEF                 | 0.903<br>[0.873 – 0.933] | <0.001  | 0.948<br>[0.910 – 0.989] | 0.013   |                          |         |
| RV LEFi                | 0.960<br>[0.939 – 0.980] | <0.001  |                          |         | 0.987<br>[0.964 – 1.011] | 0.292   |

**NOTE: If the p-value was not significant, HR + 95% CI is not included in the table (except for LEF and LEFi). LEF is an independent predictor!**

The variables listed in this table contain no missing values; thus, each model includes data from 292 patients.

### Supplementary Table VII

Factors associated with cardiac death and heart failure hospitalization in the entire study cohort

Including REF or REFi (entire study cohort):

|                        | Univariable              |         | Multivariable            |         | Multivariable            |         |
|------------------------|--------------------------|---------|--------------------------|---------|--------------------------|---------|
|                        | HR [95% CI]              | p-value | HR [95% CI]              | p-value | HR [95% CI]              | p-value |
| Age                    | 1.019<br>[1.006 – 1.032] | 0.003   |                          |         |                          |         |
| Diabetes               | 2.456<br>[1.602 – 3.766] | <0.001  | 2.076<br>[1.312 – 3.285] | 0.002   | 2.035<br>[1.288 – 3.218] | 0.002   |
| Atrial fibrillation    | 2.514<br>[1.653 – 3.824] | <0.001  |                          |         |                          |         |
| Cardiomyopathy         | 1.660<br>[1.067 – 2.583] | 0.025   |                          |         |                          |         |
| Valvular heart disease | 1.485<br>[0.994 – 2.217] | 0.054   | 2.086<br>[1.294 – 3.360] | 0.003   | 2.259<br>[1.404 – 3.634] | <0.001  |
| LV ejection fraction   | 0.967<br>[0.944 – 0.990] | <0.001  | 0.966<br>[0.952 – 0.980] | <0.001  | 0.962<br>[0.948 – 0.975] | <0.001  |
| RV REF                 | 0.947<br>[0.920 – 0.974] | <0.001  | 0.974<br>[0.944 – 1.006] | 0.109   |                          |         |
| RV REFi                | 1.014<br>[0.994 – 1.033] | 0.167   |                          |         | 1.002<br>[0.981 – 1.023] | 0.878   |

**NOTE: If the p-value was not significant, HR + 95% CI is not included in the table (except for REF and REFi).**

The variables listed in this table contain no missing values; thus, each model includes data from 292 patients.

### Supplementary Table VIII

Factors associated with cardiac death and heart failure hospitalization in the entire study cohort

Including AEF or AEFi (entire study cohort):

|                        | Univariable              |         | Multivariable            |         | Multivariable            |         |
|------------------------|--------------------------|---------|--------------------------|---------|--------------------------|---------|
|                        | HR [95% CI]              | p-value | HR [95% CI]              | p-value | HR [95% CI]              | p-value |
| Age                    | 1.019<br>[1.006 – 1.032] | 0.003   |                          |         |                          |         |
| Diabetes               | 2.456<br>[1.602 – 3.766] | <0.001  | 2.074<br>[1.313 – 3.275] | 0.002   | 2.080<br>[1.315 – 3.288] | 0.002   |
| Atrial fibrillation    | 2.514<br>[1.653 – 3.824] | <0.001  |                          |         |                          |         |
| Cardiomyopathy         | 1.660<br>[1.067 – 2.583] | 0.025   |                          |         |                          |         |
| Valvular heart disease | 1.485<br>[0.994 – 2.217] | 0.054   | 2.081<br>[1.301 – 3.329] | 0.002   | 2.156<br>[1.347 – 3.451] | 0.001   |
| LV ejection fraction   | 0.967<br>[0.944 – 0.990] | <0.001  | 0.979<br>[0.963 – 0.995] | 0.011   | 0.969<br>[0.954 – 0.984] | <0.001  |
| RV AEF                 | 0.893<br>[0.865 – 0.923] | <0.001  | 0.926<br>[0.887 – 0.967] | <0.001  |                          |         |
| RV AEFi                | 0.946<br>[0.924 – 0.967] | <0.001  |                          |         | 0.971<br>[0.945 – 0.997] | 0.028   |

**NOTE: If the p-value was not significant, HR + 95% CI is not included in the table (except for AEF and AEFi). AEF and AEFi are independent predictors!**

The variables listed in this table contain no missing values; thus, each model includes data from 292 patients.

## Supplementary Table IX

Factors associated with cardiac death and heart failure hospitalization in the entire study cohort

Including RV EDVi or RV ESVi (entire study cohort):

|                        | Univariable              |         | Multivariable            |         | Multivariable            |         |
|------------------------|--------------------------|---------|--------------------------|---------|--------------------------|---------|
|                        | HR [95% CI]              | p-value | HR [95% CI]              | p-value | HR [95% CI]              | p-value |
| Age                    | 1.019<br>[1.006 – 1.032] | 0.003   | 1.014<br>[1.000 – 1.028] | 0.047   | 1.015<br>[1.001 – 1.030] | 0.032   |
| Diabetes               | 2.456<br>[1.602 – 3.766] | <0.001  | 2.214<br>[1.392 – 3.522] | <0.001  | 2.220<br>[1.399 – 3.525] | <0.001  |
| Atrial fibrillation    | 2.514<br>[1.653 – 3.824] | <0.001  |                          |         |                          |         |
| Cardiomyopathy         | 1.660<br>[1.067 – 2.583] | 0.025   |                          |         |                          |         |
| Valvular heart disease | 1.485<br>[0.994 – 2.217] | 0.054   | 2.124<br>[1.326 – 3.401] | 0.002   | 2.052<br>[1.282 – 3.284] | 0.003   |
| LV ejection fraction   | 0.967<br>[0.944 – 0.990] | <0.001  | 0.968<br>[0.954 – 0.982] | <0.001  | 0.975<br>[0.959 – 0.992] | 0.003   |
| RV EDVi                | 1.015<br>[1.008 – 1.023] | <0.001  | 1.011<br>[1.001 – 1.020] | 0.029   |                          |         |
| RV ESVi                | 1.025<br>[1.017 – 1.033] | <0.001  |                          |         | 1.018<br>[1.006 – 1.029] | 0.003   |

**NOTE: If the p-value was not significant, HR + 95% CI is not included in the table (except for RV EDVi and RV ESVi). RV EDVi and ESVi are independent predictors!**

The variables listed in this table contain no missing values; thus, each model includes data from 292 patients.

## Supplementary Table X

Factors associated with cardiac death and heart failure hospitalization in the entire study cohort

Including TAPSE, FAC or 2DE free-wall longitudinal strain (entire study cohort):

|                                                  | Multivariable            |         | Multivariable            |         | Multivariable            |         |
|--------------------------------------------------|--------------------------|---------|--------------------------|---------|--------------------------|---------|
|                                                  | HR [95% CI]              | p-value | HR [95% CI]              | p-value | HR [95% CI]              | p-value |
| Age, n = 292                                     |                          |         | 1.014<br>[1.001 – 1.028] | 0.041   |                          |         |
| Diabetes, n = 292                                | 2.066<br>[1.304 – 3.274] | 0.002   | 2.157<br>[1.358 – 3.427] | 0.001   | 2.220<br>[1.383 – 3.565] | <0.001  |
| Atrial fibrillation,<br>n = 292                  |                          |         |                          |         | 1.591<br>[1.011 – 2.503] | 0.045   |
| Cardiomyopathy,<br>n = 292                       |                          |         |                          |         |                          |         |
| Valvular heart<br>disease, n = 292               | 2.059<br>[1.283 – 3.305] | 0.003   | 2.019<br>[1.258 – 3.239] | 0.004   | 2.086<br>[1.282 – 3.393] | 0.003   |
| LV ejection<br>fraction, n = 292                 | 0.971<br>[0.957 – 0.985] | <0.001  | 0.972<br>[0.957 – 0.987] | <0.001  | 0.971<br>[0.956 – 0.986] | <0.001  |
| TAPSE, n = 291                                   | 0.948<br>[0.911 – 0.986] | 0.008   |                          |         |                          |         |
| FAC, n = 292                                     |                          |         | 0.971<br>[0.949 – 0.993] | 0.009   |                          |         |
| 2DE free-wall<br>longitudinal<br>strain, n = 288 |                          |         |                          |         | 1.050<br>[1.015 – 1.085] | 0.004   |

**NOTE: If the p-value was not significant, HR + 95% CI is not included in the table (except for TAPSE,**

**FAC and 2DE free-wall longitudinal strain). TAPSE, FAC and 2DE free-wall longitudinal strain are**

**independent predictors!**

The value after a variable's name indicates the number of patients with available data.

**ROC analysis (optimal cutoff identified by Youden's index) to show the discriminatory power of key RV functional parameters with regards to the composite endpoint**

**Supplementary Table XI**

**AUC-ROC in the entire study cohort (full length of follow-up):**

|                                            | <b>AUC [95% CI]</b>      | <b>Optimal Cutoff</b> | <b>Sensitivity</b> | <b>Specificity</b> |
|--------------------------------------------|--------------------------|-----------------------|--------------------|--------------------|
| RV AEF, n = 292                            | 0.712<br>[0.649 – 0.776] | 14.9                  | 0.82               | 0.57               |
| RV EF, n = 292                             | 0.696<br>[0.631 – 0.761] | 43.7                  | 0.86               | 0.49               |
| RV LEF, n = 292                            | 0.685<br>[0.619 – 0.75]  | 17.3                  | 0.66               | 0.64               |
| 2DE free-wall longitudinal strain, n = 288 | 0.683<br>[0.618 – 0.749] | -24.0                 | 0.60               | 0.71               |
| TAPSE, n = 291                             | 0.672<br>[0.606 – 0.739] | 16.0                  | 0.89               | 0.40               |
| RV AEFi, n = 292                           | 0.668<br>[0.603 – 0.733] | 0.35                  | 0.73               | 0.57               |
| FAC, n = 292                               | 0.656<br>[0.588 – 0.725] | 38.1                  | 0.76               | 0.54               |
| RV LEFi, n = 292                           | 0.622<br>[0.554 – 0.69]  | 0.31                  | 0.86               | 0.36               |
| RV REF, n = 292                            | 0.594<br>[0.524 – 0.665] | 21.9                  | 0.74               | 0.46               |
| RV REFi, n = 292                           | 0.563<br>[0.495 – 0.632] | 0.49                  | 0.76               | 0.39               |

The value after a variable's name indicates the number of patients with available data.

## Supplementary Table XII

Clinical and echocardiographic characteristics of the patients with preserved right ventricular ejection fraction according to outcome.

| Variable                                         | Cardiac death or heart failure hospitalization (N=53) | No events (N=149) | p value          |
|--------------------------------------------------|-------------------------------------------------------|-------------------|------------------|
| Age, years                                       | 64±17                                                 | 56±16             | <b>0.002</b>     |
| Gender, male (%)                                 | 37 (69.8)                                             | 100 (67.1)        | 0.849            |
| Body surface area, m <sup>2</sup>                | 1.80±0.19                                             | 1.83±0.20         | 0.324            |
| BMI, kg/m <sup>2</sup>                           | 25.6±3.7                                              | 25.1±3.3          | 0.389            |
| Systolic blood pressure, mmHg                    | 129±21                                                | 126±16            | 0.720            |
| Diastolic blood pressure, mmHg                   | 74±10                                                 | 76±10             | 0.247            |
| Smoking (%)                                      | 14 (26.4)                                             | 55 (36.9)         | 0.224            |
| Diabetes (%)                                     | 13 (24.5)                                             | 11 (7.4)          | <b>0.002</b>     |
| Dyslipidemia (%)                                 | 23 (43.4)                                             | 65 (43.6)         | 1.000            |
| Obesity (%)                                      | 6 (11.3)                                              | 11 (7.4)          | 0.393            |
| Family history of CAD (%)                        | 11 (20.8)                                             | 44 (29.5)         | 0.292            |
| History of atrial fibrillation (%)               | 13 (24.5)                                             | 11 (7.4)          | <b>0.002</b>     |
| Hypertension (%)                                 | 37 (69.8)                                             | 80 (53.7)         | 0.060            |
| CAD (%)                                          | 21 (39.6)                                             | 69 (46.3)         | 0.496            |
| Valvular heart disease (%)                       | 20 (37.7)                                             | 37 (24.8)         | 0.106            |
| Cardiomyopathies (%)                             | 8 (15.1)                                              | 17 (11.4)         | 0.648            |
| LV end-diastolic volume index, ml/m <sup>2</sup> | 88.8±28.4                                             | 76.2±20.8         | <b>&lt;0.001</b> |
| LV end-systolic volume index, ml/m <sup>2</sup>  | 45.3±20.5                                             | 35.3±16.0         | <b>0.001</b>     |
| LV ejection fraction, %                          | 50.2±11.7                                             | 54.8±9.9          | <b>0.015</b>     |
| LV mass index, g/m <sup>2</sup>                  | 104.3±20.9                                            | 97.3±21.3         | <b>0.026</b>     |
| 2DE LV GLS, %                                    | -15.0±4.8                                             | -16.2±4.2         | 0.087            |



|                                                  |           |           |                  |
|--------------------------------------------------|-----------|-----------|------------------|
| 2DE left atrial volume index, ml/m <sup>2</sup>  | 53.1±22.9 | 38.8±15.1 | <b>&lt;0.001</b> |
| RV end-diastolic volume index, ml/m <sup>2</sup> | 79.7±19.1 | 74.6±17.4 | 0.067            |
| RV end-systolic volume index, ml/m <sup>2</sup>  | 39.2±9.9  | 35.9±9.7  | <b>0.032</b>     |
| RV ejection fraction, %                          | 50.9±4.1  | 51.7±4.5  | 0.252            |
| RV longitudinal ejection fraction, %             | 19.3±5.8  | 20.8±5.4  | 0.093            |
| RV radial ejection fraction, %                   | 28.6±4.9  | 27.3±5.5  | 0.061            |
| RV anteroposterior ejection fraction, %          | 18.5±4.8  | 20.5±4.4  | <b>0.008</b>     |
| RV LEFi                                          | 37.7±10.4 | 40.1±8.7  | 0.110            |
| RV REFi                                          | 56.6±9.7  | 52.9±9.4  | <b>0.018</b>     |
| RV AEFi                                          | 36.3±7.9  | 39.5±6.9  | <b>0.005</b>     |
| TAPSE, mm                                        | 21.0±4.2  | 22.6±4.4  | <b>0.038</b>     |
| FAC, %                                           | 40.9±8.7  | 43.5±6.4  | 0.063            |
| 2DE free-wall longitudinal strain, %             | -26.8±5.6 | -28.4±4.8 | 0.059            |
| PASP, mmHg                                       | 33.7±11.1 | 26.6±8.9  | <b>&lt;0.001</b> |

Values are reported as mean ± standard deviation (SD) or n (%).

**Supplementary Table XIII**

Factors associated with cardiac death and heart failure hospitalization in patients with preserved right ventricular ejection fraction

|                                                      | <b>Hazard Ratio</b><br><b>[95% Confidence Interval]</b> | <b>p value</b>   |
|------------------------------------------------------|---------------------------------------------------------|------------------|
| <b>Age, n = 202</b>                                  | <b>1.028 [1.009 – 1.048]</b>                            | <b>0.004</b>     |
| Male, n = 202                                        | 1.092 [0.607 – 1.963]                                   | 0.770            |
| Body surface area, n = 202                           | 0.451 [0.114 – 1.777]                                   | 0.255            |
| BMI, n = 202                                         | 1.029 [0.953 – 1.112]                                   | 0.462            |
| Smoking, n = 202                                     | 0.641 [0.348 – 1.180]                                   | 0.153            |
| <b>Diabetes, n = 202</b>                             | <b>2.829 [1.512 – 5.294]</b>                            | <b>0.001</b>     |
| Dyslipidemia, n = 202                                | 0.996 [0.579 – 1.715]                                   | 0.989            |
| Obesity, n = 202                                     | 1.421 [0.607 – 3.324]                                   | 0.418            |
| Family history of CAD, n = 202                       | 0.689 [0.355 – 1.339]                                   | 0.272            |
| <b>History of atrial fibrillation, n = 202</b>       | <b>2.720 [1.452 – 5.094]</b>                            | <b>0.002</b>     |
| Hypertension, n = 202                                | 1.730 [0.962 – 3.110]                                   | 0.067            |
| CAD, n = 202                                         | 0.776 [0.447 – 1.348]                                   | 0.368            |
| Valvular heart disease, n = 202                      | 1.637 [0.939 – 2.854]                                   | 0.082            |
| Cardiomyopathy, n = 202                              | 1.256 [0.592 – 2.665]                                   | 0.552            |
| <b>LV end-diastolic volume index, n = 202</b>        | <b>1.017 [1.008 – 1.027]</b>                            | <b>&lt;0.001</b> |
| <b>LV end-systolic volume index, n = 202</b>         | <b>1.023 [1.011 – 1.035]</b>                            | <b>&lt;0.001</b> |
| <b>LV ejection fraction, n = 202</b>                 | <b>0.967 [0.944 – 0.990]</b>                            | <b>0.005</b>     |
| <b>LV mass index, n = 183</b>                        | <b>1.013 [1.001 – 1.026]</b>                            | <b>0.039</b>     |
| <b>2DE LV GLS, n = 187</b>                           | 1.055 [0.990 – 1.125]                                   | 0.100            |
| <b>2DE left atrial volume index, n = 158</b>         | <b>1.029 [1.016 – 1.043]</b>                            | <b>&lt;0.001</b> |
| <b>RV end-diastolic volume index, n = 202</b>        | <b>1.014 [1.000 – 1.029]</b>                            | <b>0.050</b>     |
| <b>RV end-systolic volume index, n = 202</b>         | <b>1.030 [1.005 – 1.057]</b>                            | <b>0.021</b>     |
| RV ejection fraction, n = 202                        | 0.958 [0.898 – 1.022]                                   | 0.194            |
| RV longitudinal ejection fraction, n = 202           | 0.955 [0.907 – 1.005]                                   | 0.079            |
| RV radial ejection fraction, n = 202                 | 1.037 [0.987 – 1.088]                                   | 0.147            |
| <b>RV anteroposterior ejection fraction, n = 202</b> | <b>0.919 [0.864 – 0.976]</b>                            | <b>0.006</b>     |
| RV LEFi, n = 202                                     | 0.974 [0.944 – 1.005]                                   | 0.097            |

|                                                   |                              |                  |
|---------------------------------------------------|------------------------------|------------------|
| <b>RV REFi, n = 202</b>                           | <b>1.033 [1.005 – 1.062]</b> | <b>0.021</b>     |
| <b>RV AEFi, n = 202</b>                           | <b>0.949 [0.915 – 0.984]</b> | <b>0.004</b>     |
| <b>TAPSE, n = 201</b>                             | <b>0.932 [0.877 – 0.989]</b> | <b>0.020</b>     |
| <b>FAC, n =202</b>                                | <b>0.956 [0.920 – 0.994]</b> | <b>0.024</b>     |
| <b>2DE free-wall longitudinal strain, n = 199</b> | <b>1.056 [1.001 – 1.115]</b> | <b>0.048</b>     |
| <b>PASP, n = 185</b>                              | <b>1.045 [1.026 – 1.065]</b> | <b>&lt;0.001</b> |

---

The value after a variable's name indicates the number of patients with available data.

### Supplementary Table XIV

Factors associated with cardiac death and heart failure hospitalization in patients with preserved right ventricular ejection fraction

Including LEF or LEFi (only patients with preserved RV EF):

|                      | Univariable              |         | Multivariable            |         | Multivariable            |         |
|----------------------|--------------------------|---------|--------------------------|---------|--------------------------|---------|
|                      | HR [95% CI]              | p-value | HR [95% CI]              | p-value | HR [95% CI]              | p-value |
| Age                  | 1.028<br>[1.009 – 1.048] | 0.004   |                          |         |                          |         |
| Diabetes             | 2.829<br>[1.512 – 5.294] | 0.001   | 2.134<br>[1.110 – 4.101] | 0.023   | 2.134<br>[1.111 – 4.098] | 0.023   |
| Atrial fibrillation  | 2.720<br>[1.452 – 5.094] | 0.002   | 2.204<br>[1.146 – 4.238] | 0.018   | 2.204<br>[1.147 – 4.236] | 0.018   |
| LV ejection fraction | 0.967<br>[0.944 – 0.990] | <0.001  |                          |         |                          |         |
| RV LEF               | 0.955<br>[0.907 – 1.005] | 0.079   | 0.990<br>[0.935 – 1.048] | 0.721   |                          |         |
| RV LEFi              | 0.974<br>[0.944 – 1.005] | 0.097   |                          |         | 0.993<br>[0.960 – 1.027] | 0.683   |

**NOTE: If the p-value was not significant, HR + 95% CI is not included in the table (except for LEF and LEFi).**

The variables listed in this table contain no missing values; thus, each model includes data from 202 patients.

### Supplementary Table XV

Factors associated with cardiac death and heart failure hospitalization in patients with preserved right ventricular ejection fraction

Including REF or REFi (only patients with preserved RV EF):

|                      | Univariable              |         | Multivariable            |         | Multivariable            |         |
|----------------------|--------------------------|---------|--------------------------|---------|--------------------------|---------|
|                      | HR [95% CI]              | p-value | HR [95% CI]              | p-value | HR [95% CI]              | p-value |
| Age                  | 1.028<br>[1.009 – 1.048] | 0.004   |                          |         |                          |         |
| Diabetes             | 2.829<br>[1.512 – 5.294] | 0.001   | 2.110<br>[1.001 – 4.046] | 0.025   | 2.101<br>[1.100 – 4.015] | 0.025   |
| Atrial fibrillation  | 2.720<br>[1.452 – 5.094] | 0.002   | 2.207<br>[1.151 – 4.232] | 0.017   | 2.254<br>[1.172 – 4.334] | 0.015   |
| LV ejection fraction | 0.967<br>[0.944 – 0.990] | <0.001  | 0.976<br>[0.953 – 0.999] | 0.040   |                          |         |
| RV REF               | 1.037<br>[0.987 – 1.088] | 0.147   | 1.032<br>[0.981 – 1.086] | 0.229   |                          |         |
| RV REFi              | 1.033<br>[1.005 – 1.062] | 0.021   |                          |         | 1.022<br>[0.978 – 0.993] | 0.137   |

**NOTE: If the p-value was not significant, HR + 95% CI is not included in the table (except for REF and REFi).**

The variables listed in this table contain no missing values; thus, each model includes data from 202 patients.

### Supplementary Table XVI

Factors associated with cardiac death and heart failure hospitalization in patients with preserved right ventricular ejection fraction

Including AEF or AEFi (only patients with preserved RV EF):

|                      | Univariable              |         | Multivariable            |         | Multivariable            |         |
|----------------------|--------------------------|---------|--------------------------|---------|--------------------------|---------|
|                      | HR [95% CI]              | p-value | HR [95% CI]              | p-value | HR [95% CI]              | p-value |
| Age                  | 1.028<br>[1.009 – 1.048] | 0.004   |                          |         |                          |         |
| Diabetes             | 2.829<br>[1.512 – 5.294] | 0.001   | 2.221<br>[1.161 – 4.247] | 0.016   | 2.291<br>[1.197 – 4.387] | 0.012   |
| Atrial fibrillation  | 2.720<br>[1.452 – 5.094] | 0.002   | 2.264<br>[1.171 – 4.379] | 0.015   | 2.260<br>[1.167 – 4.376] | 0.016   |
| LV ejection fraction | 0.967<br>[0.944 – 0.990] | <0.001  |                          |         |                          |         |
| RV AEF               | 0.919<br>[0.864 – 0.976] | 0.006   | 0.942<br>[0.883 – 1.004] | 0.067   |                          |         |
| RV AEFi              | 0.949<br>[0.915 – 0.984] | 0.004   |                          |         | 0.960<br>[0.925 – 0.997] | 0.032   |

**NOTE: If the p-value was not significant, HR + 95% CI is not included in the table (except for AEF and**

**AEFi). AEFi is an independent predictor!**

The variables listed in this table contain no missing values; thus, each model includes data from 202 patients.

### Supplementary Table XVII

Factors associated with cardiac death and heart failure hospitalization in patients with preserved right ventricular ejection fraction

Including RV EDVi or RV ESVi (only patients with preserved RV EF):

|                      | Univariable              |         | Multivariable            |         | Multivariable            |         |
|----------------------|--------------------------|---------|--------------------------|---------|--------------------------|---------|
|                      | HR [95% CI]              | p-value | HR [95% CI]              | p-value | HR [95% CI]              | p-value |
| Age                  | 1.028<br>[1.009 – 1.048] | 0.004   |                          |         |                          |         |
| Diabetes             | 2.829<br>[1.512 – 5.294] | 0.001   | 2.293<br>[1.193 – 4.409] | 0.013   | 2.268<br>[1.183 – 4.346] | 0.014   |
| Atrial fibrillation  | 2.720<br>[1.452 – 5.094] | 0.002   | 2.034<br>[1.053 – 3.929] | 0.035   | 2.028<br>[1.047 – 3.926] | 0.036   |
| LV ejection fraction | 0.967<br>[0.944 – 0.990] | <0.001  |                          |         |                          |         |
| RV EDVi              | 1.014<br>[1.000 – 1.029] | 0.050   | 1.012<br>[0.997 – 1.027] | 0.130   |                          |         |
| RV ESVi              | 1.030<br>[1.005 – 1.057] | 0.021   |                          |         | 1.022<br>[0.994 – 1.051] | 0.120   |

**NOTE: If the p-value was not significant, HR + 95% CI is not included in the table (except for RV EDVi and RV ESVi).**

The variables listed in this table contain no missing values; thus, each model includes data from 202 patients.

### Supplementary Table XVIII

Factors associated with cardiac death and heart failure hospitalization in patients with preserved right ventricular ejection fraction

Including TAPSE, FAC or 2DE free-wall longitudinal strain (only patients with preserved RV EF):

|                                                  | Multivariable            |         | Multivariable            |         | Multivariable            |         |
|--------------------------------------------------|--------------------------|---------|--------------------------|---------|--------------------------|---------|
|                                                  | HR [95% CI]              | p-value | HR [95% CI]              | p-value | HR [95% CI]              | p-value |
| Age, n = 202                                     |                          |         |                          |         |                          |         |
| Diabetes, n = 202                                | 2.125<br>[1.104 – 4.091] | 0.024   | 2.073<br>[1.078 – 3.987] | 0.029   | 2.395<br>[1.237 – 4.636] | 0.010   |
| Atrial fibrillation,<br>n = 202                  | 2.217<br>[1.146 – 4.289] | 0.018   |                          |         | 2.379<br>[1.228 – 4.610] | 0.010   |
| LV ejection fraction,<br>n = 202                 |                          |         |                          |         |                          |         |
| TAPSE, n = 201                                   | 0.954<br>[0.899 – 1.013] | 0.122   |                          |         |                          |         |
| FAC, n = 202                                     |                          |         | 0.972<br>[0.932 – 1.014] | 0.193   |                          |         |
| 2DE free-wall<br>longitudinal strain, n<br>= 199 |                          |         |                          |         | 1.027<br>[0.973 – 1.084] | 0.331   |

**NOTE: If the p-value was not significant, HR + 95% CI is not included in the table (except for TAPSE, FAC and 2DE free-wall longitudinal strain).**

The value after a variable's name indicates the number of patients with available data.



**ROC analysis (optimal cutoff identified by Youden's index) to show the discriminatory power of key RV functional parameters with regards to the composite endpoint**

**Supplementary Table XIX**

**AUC-ROC in patients with preserved RV EF (full length of follow-up):**

|                                                  | <b>AUC [95% CI]</b>      | <b>Optimal Cutoff</b> | <b>Sensitivity</b> | <b>Specificity</b> |
|--------------------------------------------------|--------------------------|-----------------------|--------------------|--------------------|
| RV AEFi, n = 202                                 | 0.624<br>[0.533 – 0.716] | 0.35                  | 0.77               | 0.47               |
| RV AEF, n = 202                                  | 0.617<br>[0.525 – 0.709] | 19.1                  | 0.63               | 0.60               |
| RV REFi, n = 202                                 | 0.608<br>[0.520 – 0.696] | 0.48                  | 0.83               | 0.36               |
| 2DE free-wall<br>longitudinal strain,<br>n = 199 | 0.598<br>[0.504 – 0.692] | -26.5                 | 0.54               | 0.69               |
| TAPSE, n = 201                                   | 0.596<br>[0.508 – 0.684] | 13.0                  | 1.00               | 0.02               |
| RV REF, n = 202                                  | 0.587<br>[0.499 – 0.675] | 28.8                  | 0.55               | 0.64               |
| FAC, n = 202                                     | 0.575<br>[0.479 – 0.672] | 38.1                  | 0.84               | 0.36               |
| RV LEFi, n = 202                                 | 0.566<br>[0.475 – 0.658] | 0.46                  | 0.28               | 0.85               |
| RV LEF, n = 202                                  | 0.558<br>[0.466 – 0.650] | 22.6                  | 0.35               | 0.79               |
| RV EF, n = 202                                   | 0.553<br>[0.463 – 0.643] | 49.7                  | 0.63               | 0.51               |

The value after a variable's name indicates the number of patients with available data.
